# Supplementary material for: A Calcineurin Regulator MoRCN1 Is Important for Asexual Development, Stress Response, and Plant Infection of Magnaporthe oryzae
Source: PubMed Central journal article supplement (PMC9244802; doi:10.3389/fpls.2022.925645), 2022-06-16
Supplement: Data_Sheet_1.pdf [file Data_Sheet_1.pdf]

## Supplemental Figures

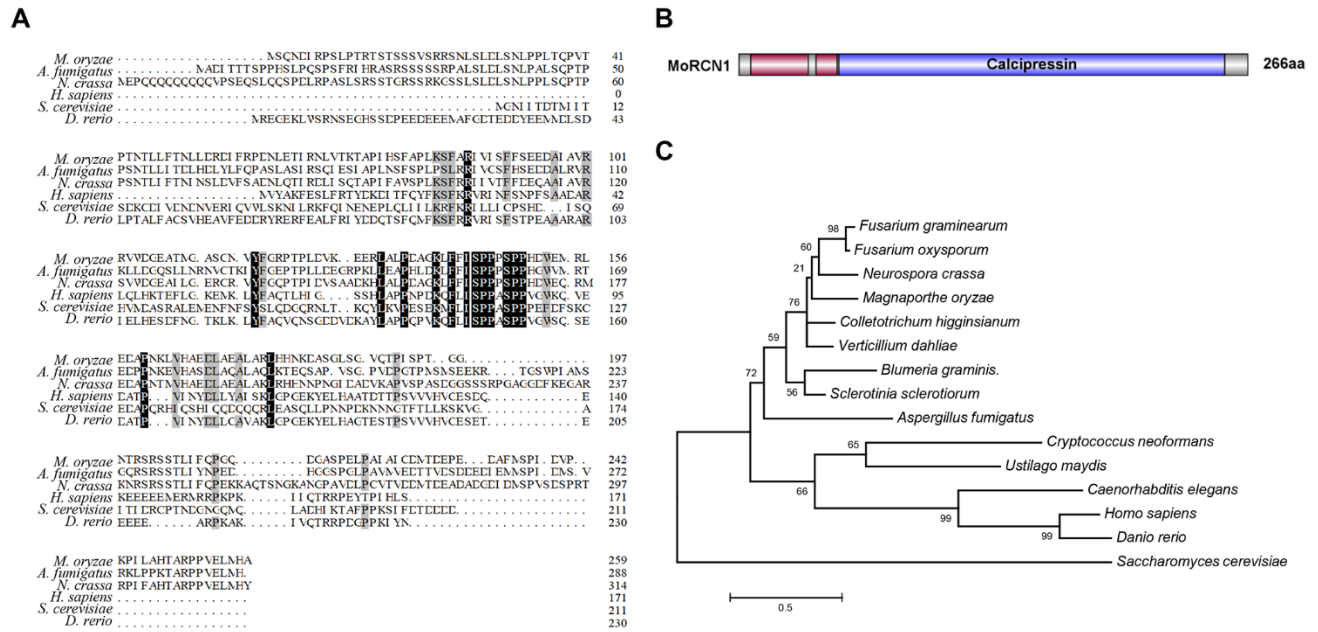

**Supplementary Figure 1 | Analyses of RCN1 functional domain and systematic evolution. (A)** Alignment of the amino acid sequences of LDP1 from *M. oryzae* and other selected model organisms. Amino acid sequences were aligned with ClustalW (<http://www.ch.embnet.org/software/ClustalW.html>). Identical residues are colored by black regions, and similar residues are colored by gray regions. **(B)** Analysis of MoRCN1 protein structure. Region marked blue shows Calcipressin domain. **(C)** A phylogenetic tree of the RCN1 amino acid sequences in different species. Numbers at nodes indicate the percentages of occurrence. Scale bar indicates the number of amino acid differences per site.

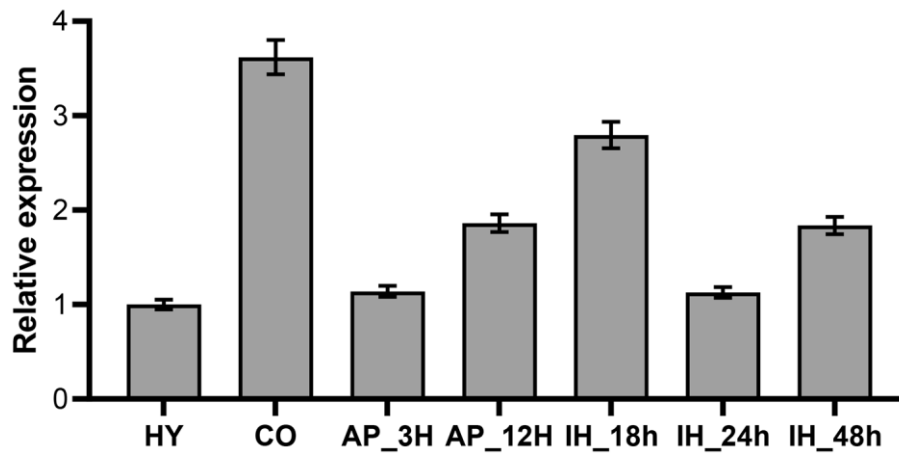

**Supplementary Figure 2** | Expression of *RCNI* at different developmental and infection stages in *M. oryzae*. The actin gene *MoAct1* was used as an internal control. Expression level of *RCNI* in HY was set as 1. HY-hyphae; CO-conidia; AP-3h, appressorium at 3 h; AP-12h, appressorium at 12 h; IH-18h, infectious hyphae at 18 h; IH-24h, infectious hyphae at 24 h; IH-48h, infectious hyphae at 48 h.

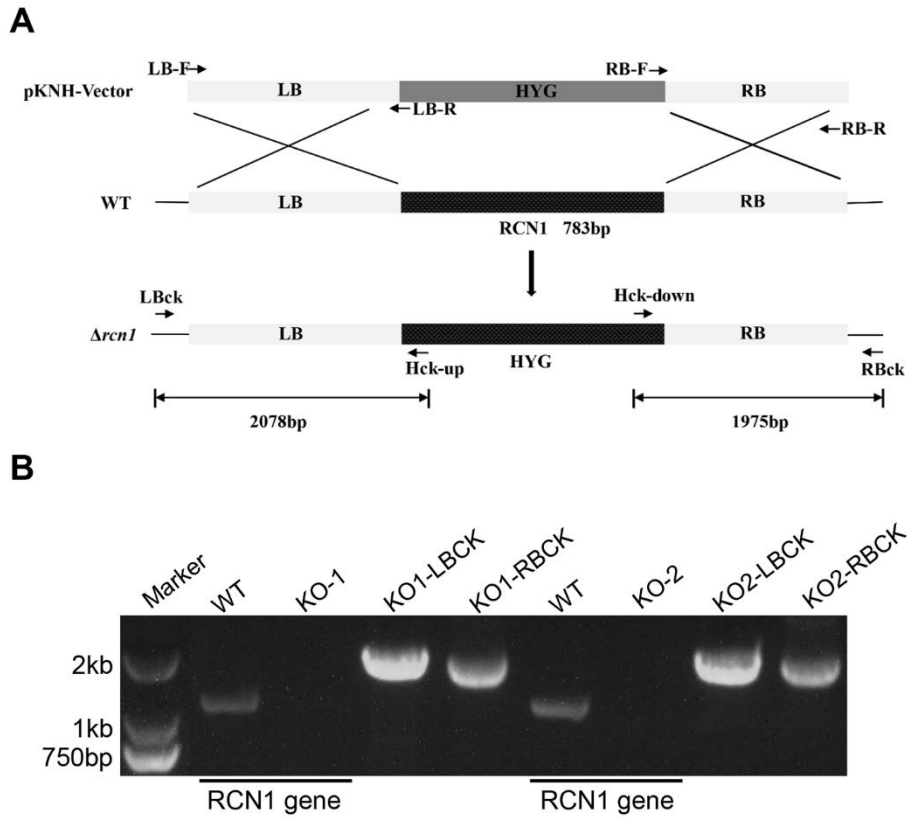

**Supplementary Figure 3 | Replacement strategy and confirmation of *RCN1* deletion mutants. (A)** Gene replacement of *RCN1* through a split-marker approach. White bars represent genomic regions upstream and downstream of the *PAL1* coding sequence that was amplified and fused to segments of the hygromycin phosphotransferase (*HYG*) cassette. **(B)** PCR verification of the deletion mutants. Flanking sequences besides the replacement fragment was amplified by using primer pairs of LCK/HCK-up and RCK/HCK-down. RT-PCR verification was performed by amplifying the *RCN1* gene in the transformants and the wild-type strain (WT).

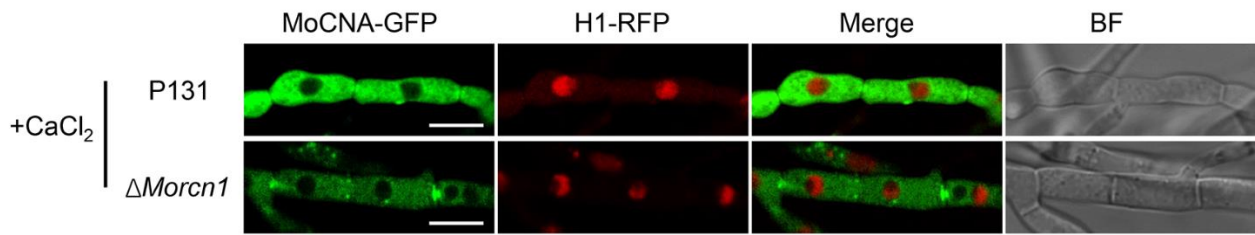

**Supplementary Figure 4** | Subcellular localization of MoCNA in WT and  $\Delta$ *Morcn1* mutants under high Ca<sup>2+</sup> concentration level. MoCNA and H1-RFP were co-transformed into WT and  $\Delta$ *Morcn1* mutant. The co-localization was observed under the confocal. Bar, 10  $\mu$ m.

**A**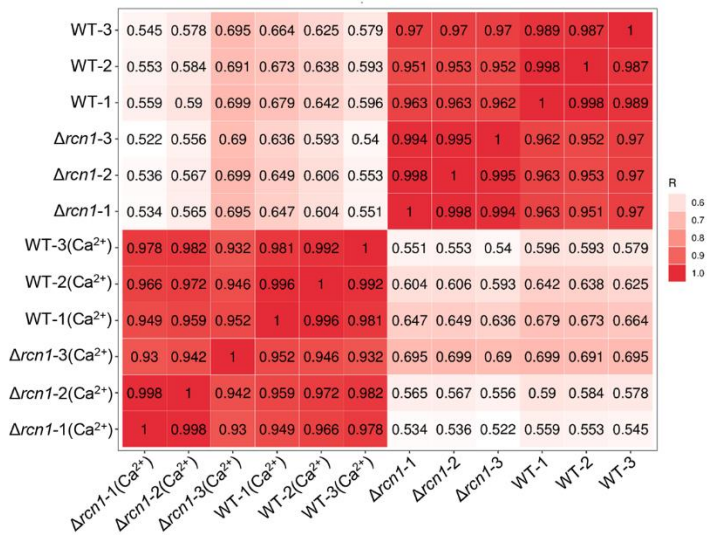**B**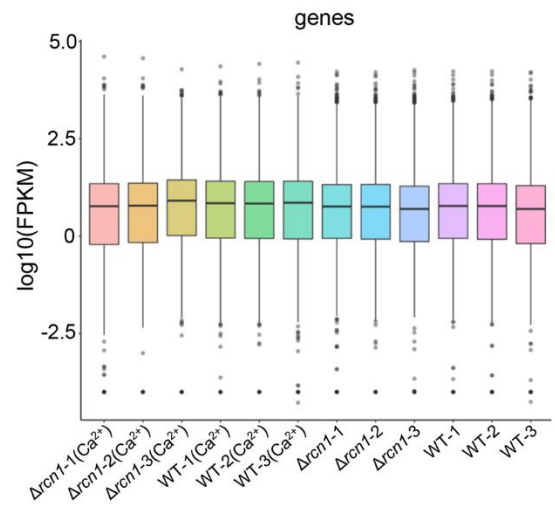

**Supplementary Figure 5** | Correlation of different samples and normalization of RNA-seq data. **(A)** Pearson correlation between samples. **(B)** Boxplots showing the normalized values of gene expression detected in RNA-seq.
